# Supplementary material
Source: PubMed Central journal article supplement (PMC3705617)
Supplement: 97320630009466S1.pdf [file 97320630009466S1.pdf]

## Supplementary material:

**Table 1:** The positions of guanosine residues close to the anticodon in tRNAs

| S.No | Organisms                               | tRNA types and occurrence of amino acid specific tRNAs anticodon and its GpG, CpG, ApG & UpG sequences next to the anticodon at different positions 36, 37, 38, 39 and 40           |                                                                                                                                                                                                           |                                                                                                                |                                                                                  |                                                                                                                                                            |
|------|-----------------------------------------|-------------------------------------------------------------------------------------------------------------------------------------------------------------------------------------|-----------------------------------------------------------------------------------------------------------------------------------------------------------------------------------------------------------|----------------------------------------------------------------------------------------------------------------|----------------------------------------------------------------------------------|------------------------------------------------------------------------------------------------------------------------------------------------------------|
|      |                                         | G36                                                                                                                                                                                 | G37                                                                                                                                                                                                       | G38                                                                                                            | G39                                                                              | G40                                                                                                                                                        |
| 1    | <i>Anaplasma phagocytophilum</i> HZ     | NA                                                                                                                                                                                  | tRNA <sup>His</sup> GTGG<br>tRNA <sup>Val</sup> GACG                                                                                                                                                      | tRNA <sup>Arg</sup> ACGG<br>tRNA <sup>Leu</sup> CAGG,<br>GAGG,TAGG<br>tRNA <sup>Pro</sup> TGGG                 | tRNA <sup>Arg</sup> CCGG<br>tRNA <sup>Pro</sup> GGGG                             | NA                                                                                                                                                         |
| 2    | <i>Aquifex aeolicus</i>                 | NA                                                                                                                                                                                  | tRNA <sup>Pro</sup> CGGG,<br>GGGG, TGGG<br>tRNA <sup>His</sup> GTGG                                                                                                                                       | tRNA <sup>Arg</sup> ACGG,<br>GGGG<br>tRNA <sup>Leu</sup> CAGG,<br>GAGG                                         | NA                                                                               | NA                                                                                                                                                         |
| 3    | <i>Bartonella henselae</i> Houston-1    | tRNA <sup>Gln</sup> TTGG                                                                                                                                                            | NA                                                                                                                                                                                                        | tRNA <sup>His</sup> GTGG<br>tRNA <sup>Leu</sup> CAGG,<br>GAGG<br>tRNA <sup>Pro</sup> TGGG,<br>GGGG             | NA                                                                               | NA                                                                                                                                                         |
| 4    | <i>Escherichia coli</i> K12             | NA                                                                                                                                                                                  | NA                                                                                                                                                                                                        | tRNA <sup>Arg</sup> CCGG<br>tRNA <sup>Leu</sup> CAGG,<br>TAGG, GAGG<br>tRNA <sup>Pro</sup> CGGG,<br>TAGG, GGGG | NA                                                                               | NA                                                                                                                                                         |
| 5    | <i>Haemophilus influenzae</i>           | NA                                                                                                                                                                                  | NA                                                                                                                                                                                                        | tRNA <sup>Arg</sup> CCGG<br>tRNA <sup>Leu</sup> GAGG,<br>TAGG<br>tRNA <sup>Pro</sup> TGGG                      | NA                                                                               | NA                                                                                                                                                         |
| 6    | <i>Mycobacterium tuberculosis</i> H37Rv | NA                                                                                                                                                                                  | tRNA <sup>Arg</sup> CCGG<br>tRNA <sup>Gln</sup> CTGG,<br>TTGG<br>tRNA <sup>Leu</sup> CAGG,<br>GAGG                                                                                                        | tRNA <sup>Leu</sup> TAGG<br>tRNA <sup>Pro</sup> CGGG,<br>TAGG, GGGG                                            | NA                                                                               | NA                                                                                                                                                         |
| 7    | <i>Staphylococcus aureus</i> MRSA252    | NA                                                                                                                                                                                  | tRNA <sup>Arg</sup> CCGG<br>tRNA <sup>His</sup> GTGG<br>tRNA <sup>Leu</sup> GAGG<br>tRNA <sup>Phe</sup> GAAG                                                                                              | tRNA <sup>Arg</sup> ACGG<br>tRNA <sup>Leu</sup> TAGG<br>tRNA <sup>Pro</sup> TGGG                               | NA                                                                               | NA                                                                                                                                                         |
| 8    | <i>Streptococcus pneumoniae</i> D39     | NA                                                                                                                                                                                  | tRNA <sup>Arg</sup> CCGG<br>tRNA <sup>His</sup> GTGG<br>tRNA <sup>Phe</sup> GAAG                                                                                                                          | tRNA <sup>Leu</sup> AAGG,<br>TAGG<br>tRNA <sup>Pro</sup> TGGG                                                  | NA                                                                               | NA                                                                                                                                                         |
| 9    | <i>Methanococcus jannaschii</i>         | tRNA <sup>Cys</sup> GCAG                                                                                                                                                            | tRNA <sup>His</sup> GTGG<br>tRNA <sup>Arg</sup> TCGG                                                                                                                                                      | tRNA <sup>Gln</sup> TTGG<br>tRNA <sup>Try</sup> GTAG                                                           | tRNA <sup>Arg</sup> TCGG<br>tRNA <sup>Pro</sup> GGGG<br>tRNA <sup>Ser</sup> GGAG | tRNA <sup>Pro</sup> TGGG<br>tRNA <sup>Glu</sup> TTCG<br>tRNA <sup>Ser</sup> TGAG<br>tRNA <sup>Trp</sup> CCAG<br>tRNA <sup>Leu</sup> GAGG,<br>TAGG,<br>TAAG |
| 10   | <i>Homo sapiens</i> hg19                | tRNA <sup>Arg</sup> CCTG<br>tRNA <sup>Cys</sup> GCAG<br>tRNA <sup>Pro</sup> AGGG,<br>CGGG, TGGG<br>tRNA <sup>Trp</sup> CCAG<br>tRNA <sup>Tyr</sup> GTAG<br>tRNA <sup>Ser</sup> AGAG | tRNA <sup>Arg</sup> ACGG<br>tRNA <sup>Cys</sup> GCAG<br>tRNA <sup>His</sup> GTGG<br>tRNA <sup>Leu</sup> TAAG<br>tRNA <sup>Phe</sup> GAAG<br>tRNA <sup>Gln</sup> TTGG<br>tRNA <sup>Tyr</sup> ATAG,<br>GTAG | tRNA <sup>Leu</sup> AAGG,<br>CAAG, TAGG,<br>AAGG<br>tRNA <sup>Gln</sup> CTGG<br>tRNA <sup>Ser</sup> AGAG       | tRNA <sup>Pro</sup> GGGG<br>tRNA <sup>Gln</sup> TTGG<br>tRNA <sup>Trp</sup> CCAG | NA                                                                                                                                                         |
